# Supplementary material for: Liver Immune Cells Release Type 1 Interferon Due to DNA Sensing and Amplify Liver Injury from Acetaminophen Overdose
Source: MDPI journal article supplement (doi:10.3390/cells7080088), 2018-07-27
Supplement: s1 [file s1]

**Table S1. List of primers used in the study.**

| Gene                   | Primer  | Sequence (5'-3')          |
|------------------------|---------|---------------------------|
| <i>Gapdh</i>           | Forward | AGGTCGGTGTGAACGGATTTG     |
|                        | Reverse | TGTAGACCATGTAGTTGAGGTCA   |
| <i>18s</i>             | Forward | CGTTCCACCAACTAAGAACG      |
|                        | Reverse | CTCAACACGGGAAACCTCAC      |
| <i>Rpl4</i>            | Forward | CCGTCCCCTCATATCGGTGTA     |
|                        | Reverse | GCATAGGGCTGTCTGTTGTTTT    |
| <i>Sdha</i>            | Forward | GCGGTGGTCACCTTGATCC       |
|                        | Reverse | CCTCTGTAGAAGCGTCTGAATG    |
| <i>Hprt</i>            | Forward | TCAGTCAACGGGGGACATAAA     |
|                        | Reverse | GGGGCTGTACTGCTTAACCAG     |
| <i>Actb</i>            | Forward | GGCTGTATTCCCCTCCATCG      |
|                        | Reverse | CCAGTTGGTAACAATGCCATGT    |
| <i>Mb21d1</i> (cGAS)   | Forward | GAGGCGCGGAAAGTCGTAA       |
|                        | Reverse | TTGTCCGGTTCCTTCCTGGA      |
| <i>Tmem173</i> (STING) | Forward | GGTCACCGCTCCAAATATGTAG    |
|                        | Reverse | CAGTAGTCCAAGTTCGTGCGA     |
| <i>Aim2</i>            | Forward | GTCACCAGTTCCTCAGTTGTG     |
|                        | Reverse | CACCTCCATTGTCCCTGTTTTAT   |
| <i>Ifna4</i>           | Forward | TGATGAGCTACTACTGGTCAGC    |
|                        | Reverse | GATCTCTTAGCACAAGGATGGC    |
| <i>Ifnb</i>            | Forward | TGAATGGAAAGATCAACCTCACCTA |

|                        |         |                         |
|------------------------|---------|-------------------------|
|                        | Reverse | CTCTTCTGCATCTTCTCCGTCA  |
| <i>Il1b</i>            | Forward | GCAACTGTTCTGAACTCAACT   |
|                        | Reverse | ATCTTTTGGGGTCCGTCAACT   |
| <i>Cxcl10</i>          | Forward | CCAAGTGCTGCCGTCATTTTC   |
|                        | Reverse | GGCTCGCAGGGATGATTTCAA   |
| <i>Rsad2</i> (Viperin) | Forward | TGCTGGCTGAGAATAGCATTAGG |
|                        | Reverse | GCTGAGTGCTGTTCCCATCT    |
| <i>Isg15</i>           | Forward | GGTGTCCTGACTAACTCCAT    |
|                        | Reverse | TGGAAAGGGTAAGACCGTCCT   |
| <i>Tlr9</i>            | Forward | ATGGTTCTCCGTCTGAAGGACT  |
|                        | Reverse | GAGGCTTCAGCTCACAGGG     |

## Heatmap cq values

### Hepatocytes

| Gene                    | Group    | Quantification cycle (Cq) |             |
|-------------------------|----------|---------------------------|-------------|
|                         |          | Mean                      | Range       |
| <i>Mb21d1</i><br>(cGAS) | Saline   | 26.14                     | 25.03-27.11 |
|                         | APAP 06h | 29.74                     | 29.11-30.61 |
|                         | APAP 12h | 30.06                     | 30.81-31.56 |
|                         | APAP 24h | 31.17                     | 29.50-30.73 |

|                           |          |       |             |
|---------------------------|----------|-------|-------------|
| <i>Tmem173</i><br>(STING) | Saline   | 31.69 | 26.91-29.24 |
|                           | APAP 06h | 27.87 | 29.23-35.12 |
|                           | APAP 12h | 29.34 | 28.51-30.45 |
|                           | APAP 24h | 28.79 | 28.48-29.23 |
| <i>Tlr9</i>               | Saline   | 31.05 | 29.70-33.05 |
|                           | APAP 06h | 34.09 | 32.89-35.72 |
|                           | APAP 12h | 34.17 | 33.44-35.05 |
|                           | APAP 24h | 33.01 | 32.78-33.22 |
| <i>Aim2</i>               | Saline   | 23.41 | 22.60-25.95 |
|                           | APAP 06h | 27.50 | 27.13-27.81 |
|                           | APAP 12h | 28.52 | 27.87-29.51 |
|                           | APAP 24h | 27.71 | 27.27-28.11 |
| <i>Ifnb</i>               | Saline   | 29.12 | 27.89-29.86 |
|                           | APAP 06h | 28.65 | 28.21-29.09 |
|                           | APAP 12h | 24.93 | 23.70-25.63 |
|                           | APAP 24h | 23.61 | 22.35-25.39 |
| <i>Ifna4</i>              | Saline   | 29.03 | 28.34-29.53 |
|                           | APAP 06h | 30.22 | 29.19-31.72 |
|                           | APAP 12h | 25.38 | 23.19-27.08 |
|                           | APAP 24h | 26.53 | 23.10-28.48 |
| <i>Il1b</i>               | Saline   | 26.77 | 25.03-29.21 |
|                           | APAP 06h | 23.63 | 22.70-24.87 |
|                           | APAP 12h | 23.50 | 21.78-25.43 |

|  |          |       |             |
|--|----------|-------|-------------|
|  | APAP 24h | 27.29 | 27.09-27.45 |
|--|----------|-------|-------------|

## Heatmap cq values

### NPCs

| Gene                      | Group    | Quantification cycle (Cq) |             |
|---------------------------|----------|---------------------------|-------------|
|                           |          | Mean                      | Range       |
| <i>Mb21d1</i><br>(cGAS)   | Saline   | 24.68                     | 23.35-26.71 |
|                           | APAP 06h | 21.25                     | 24.03-25.54 |
|                           | APAP 12h | 21.64                     | 19.74-24.36 |
|                           | APAP 24h | 19.65                     | 16.54-21.46 |
| <i>Tmem173</i><br>(STING) | Saline   | 29.62                     | 28.84-31.15 |
|                           | APAP 06h | 25.54                     | 24.56-26.34 |
|                           | APAP 12h | 21.55                     | 20.81-22.12 |
|                           | APAP 24h | 22.02                     | 19.56-23.51 |
| <i>Tlr9</i>               | Saline   | 28.87                     | 28.27-29.29 |
|                           | APAP 06h | 28.99                     | 28.59-29.43 |
|                           | APAP 12h | 26.09                     | 23.30-29.29 |
|                           | APAP 24h | 25.36                     | 24.19-25.97 |
| <i>Aim2</i>               | Saline   | 22.94                     | 22.67-23.45 |
|                           | APAP 06h | 23.29                     | 22.72-24.12 |
|                           | APAP 12h | 19.49                     | 16.44-24.65 |
|                           | APAP 24h | 19.36                     | 17.22-20.93 |
| <i>Ifnb</i>               | Saline   | 29.12                     | 27.89-29.86 |

|              |          |       |             |
|--------------|----------|-------|-------------|
|              | APAP 06h | 28.65 | 28.21-29.09 |
|              | APAP 12h | 24.93 | 23.70-25.63 |
|              | APAP 24h | 23.61 | 22.35-25.39 |
| <i>Ifna4</i> | Saline   | 29.03 | 28.34-29.53 |
|              | APAP 06h | 30.22 | 29.19-31.72 |
|              | APAP 12h | 25.38 | 23.19-27.08 |
|              | APAP 24h | 26.53 | 23.10-28.48 |
| <i>Il1b</i>  | Saline   | 29.93 | 29.20-31.14 |
|              | APAP 06h | 23.75 | 22.19-26.22 |
|              | APAP 12h | 22.47 | 19.33-24.00 |
|              | APAP 24h | 21.08 | 21.35-24.41 |
